# Supplementary material
Source: Springer Nature journal article supplement (https://www.springermedizin.de/resource/supplementary/12874_2011_673_MOESM7_ESM.pdf/9432352)

Percentage

100%

80%

60%

40%

20%

0%

- ◆ Financial
- Historical Inpatient PM
- ▲ Current Inpatient EHR
- Outpatient

1999

2000

2001

2002

2003

2004

2005

2006

2007

2008

2009

2010

Year

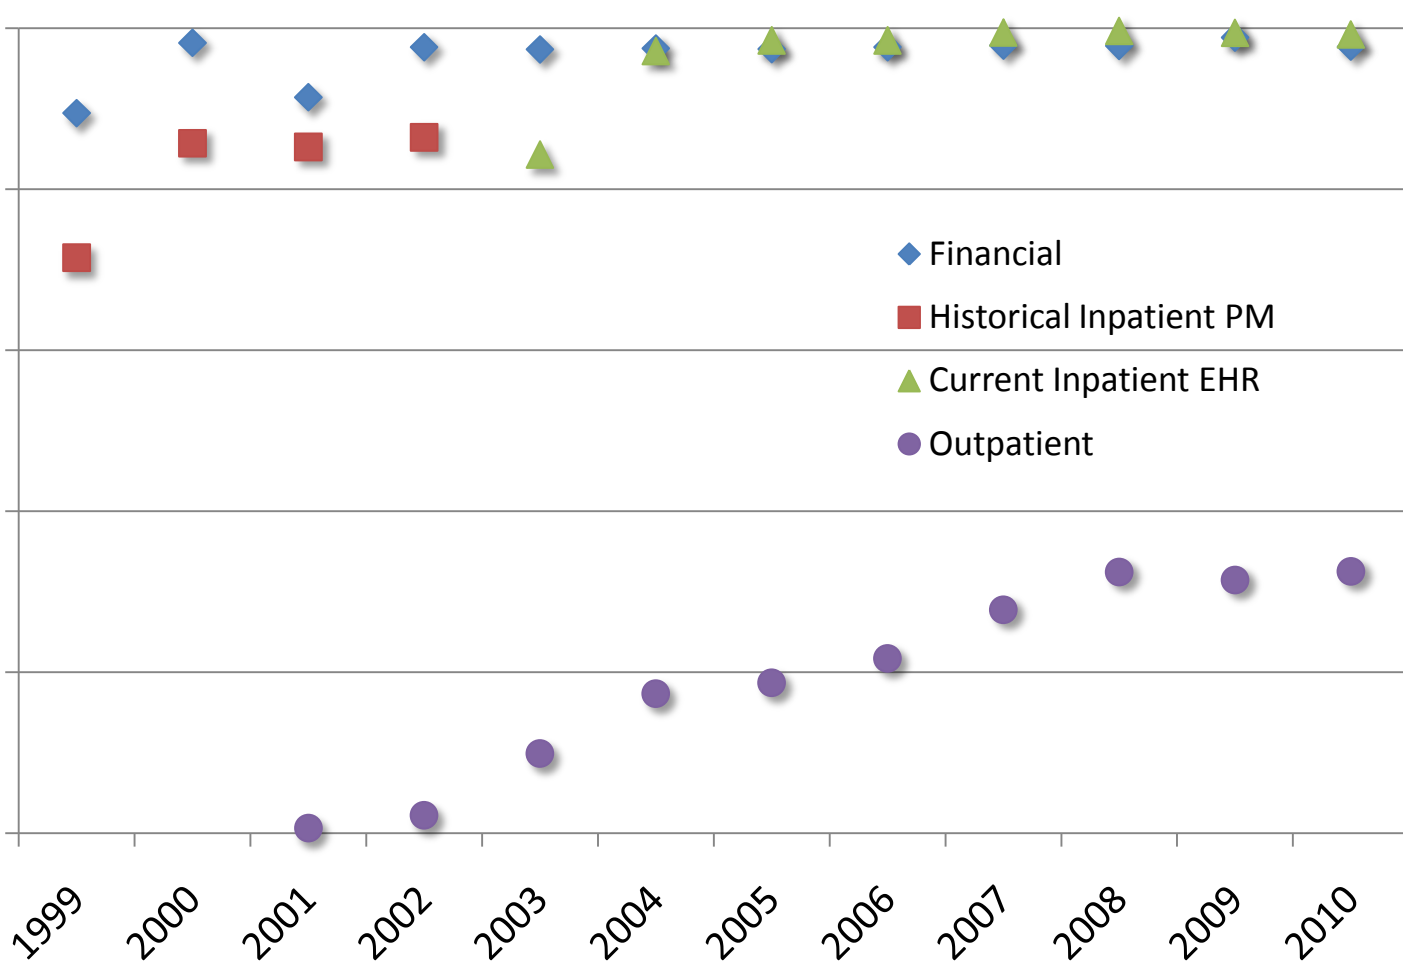

Supplement: MOESM7 [file 9432352]
